# Supplementary material for: Application of R2-ISS risk stratification to patients with multiple myeloma treated with autologous stem cell transplants at UAMS
Source: PubMed Central journal article supplement — Blood Adv. 2023 Sep 29;7(21):6676–84. doi: 10.1182/bloodadvances.2023011096 (PMC10637884; doi:10.1182/bloodadvances.2023011096), 2023-09-29
Supplement: BLOODA_ADV-2023-011096-mmc1.pdf [file BLOODA_ADV-2023-011096-mmc1.pdf]

## Supplemental Data

**Table S1. Missing proportion of analyzed data**

| Variables                                  | Missing proportion |
|--------------------------------------------|--------------------|
| Sex                                        | 0                  |
| Race                                       | 0.0151             |
| Isotype                                    | 0                  |
| Serum light chain                          | 0.0012             |
| Urine light chain                          | 0.4698             |
| Plasma cell<br>percentage (by<br>puncture) | 0.0395             |
| Plasma cell<br>percentage (by biopsy)      | 0.0616             |
| ALBUMIN                                    | 0.0012             |
| B2M                                        | 0.0035             |
| LDH                                        | 0.0035             |
| CREATININE                                 | 0.0047             |
| CRP                                        | 0.0035             |
| Hb                                         | 0.0035             |
| Platelets                                  | 0.0012             |
| Monocytes                                  | 0                  |
| Lymphocytes                                | 0                  |
| Serum M protein                            | 0.0209             |
| Urine M protein                            | 0.0058             |
| Ca                                         | 0.0012             |
| t(4;14)                                    | 0                  |
| t(14;16)                                   | 0                  |
| t(14;20)                                   | 0                  |
| del 1p                                     | 0                  |
| +1q21                                      | 0                  |
| del 17p                                    | 0                  |

**Table S2. Patient information at diagnosis before and after imputation**

| tim         | Original data | Data after imputation |
|-------------|---------------|-----------------------|
| Sex, n (%)  |               |                       |
| Female      | 335 (39)      | 335 (39)              |
| Male        | 525 (61)      | 525 (61)              |
| Race, n (%) |               |                       |
| Asian       | 3 (0)         | 3 (0)                 |

|                                                      |                      |                     |
|------------------------------------------------------|----------------------|---------------------|
| Africa American                                      | 101 (12)             | 101 (12)            |
| Native American                                      | 2 (0)                | 2 (0)               |
| Pacific Islander                                     | 1 (0)                | 1 (0)               |
| Caucasian American                                   | 740 (86)             | 753 (88)            |
| NA                                                   | 13 (2)               |                     |
| Isotype, n (%)                                       |                      |                     |
| Biclonal Disease                                     | 2 (0)                | 2 (0)               |
| Free Light Chain                                     | 152 (18)             | 152 (18)            |
| IgA                                                  | 177 (21)             | 177 (21)            |
| IgD                                                  | 9 (1)                | 9 (1)               |
| IgG                                                  | 506 (59)             | 506 (59)            |
| IgM                                                  | 3 (0)                | 3 (0)               |
| Nonsecretory                                         | 11 (1)               | 11 (1)              |
| Serum light chain, n (%)                             |                      |                     |
| Kappa                                                | 550 (64)             | 550 (64)            |
| Kappa + Lambda                                       | 1 (0)                | 1 (0)               |
| Lambda                                               | 299 (35)             | 300 (35)            |
| None                                                 | 9 (1)                | 9 (1)               |
| NA                                                   | 1(<1)                | 0                   |
| Urine light chain, n (%)                             |                      |                     |
| Kappa                                                | 223 (26)             | 435 (51)            |
| Kappa + Lambda                                       | 2 (0)                | 4 (0)               |
| Lambda                                               | 142 (17)             | 246 (29)            |
| None                                                 | 89 (10)              | 175 (20)            |
| NA                                                   | 404(47)              | 0                   |
| Plasma cell percentage (by puncture), Median (Q1,Q3) | 38 (20, 57)          | 38 (20, 57.62)      |
| Plasma cell percentage (by biopsy), Median (Q1,Q3)   | 45 (20, 70)          | 40 (20, 70)         |
| ALBUMIN, Median (Q1,Q3)                              | 3.8 (3.4, 4.2)       | 3.8 (3.4, 4.2)      |
| B2M, Median (Q1,Q3)                                  | 3.7 (2.5, 6.1)       | 3.7 (2.5, 6.1)      |
| LDH, Median (Q1,Q3)                                  | 152 (127, 185)       | 152 (127, 185)      |
| CREATININE, Median (Q1,Q3)                           | 1 (0.8, 1.28)        | 1 (0.8, 1.27)       |
| GFR                                                  | 69.27 (53.74, 84.73) | 69.31 (53.9, 84.73) |
| CRP, Median (Q1,Q3)                                  | 4.5 (2.3, 6.6)       | 4.5 (2.21, 6.6)     |
| Hb, Mean ± SD                                        | 11.23 ± 2.03         | 11.22 ± 2.04        |
| Platelets, Median (Q1,Q3)                            | 219 (171, 268.5)     | 219 (171, 269)      |
| Monocytes, Median (Q1,Q3)                            | 8.2 (6.3, 10.62)     | 8.2 (6.3, 10.62)    |
| Lymphocytes, Median (Q1,Q3)                          | 29.4 (21, 38.1)      | 29.4 (21, 38.1)     |
| SM, Median (Q1,Q3)                                   | 2.59 (0.7, 4.27)     | 2.5 (0.5, 4.2)      |
| UM, Median (Q1,Q3)                                   | 25 (0, 732)          | 18.5 (0, 730.5)     |
| Ca, Median (Q1,Q3)                                   | 9.2 (8.8, 9.7)       | 9.2 (8.8, 9.7)      |

**Table S3. Definition of high and low levels of variables**

| Variables              | high                      | low                            |
|------------------------|---------------------------|--------------------------------|
| Plasma cell percentage | >=60                      |                                |
| B2M                    | >=5.5 mg/l                |                                |
| LDH                    | >=190 U/L                 |                                |
| Creatinine             | >=2 mg/L                  |                                |
| GFR                    |                           | <60 mL/min/1.73 m <sup>2</sup> |
| CRP                    | >=8 mg/L                  |                                |
| Hb                     | >10 g/dl                  |                                |
| Platelets              | >=150 *10 <sup>9</sup> /L |                                |
| Monocytes percentage   | >8                        | <2                             |
| Lymphocytes percentage | >40                       | <20                            |
| Serum M protein        | >=3 g/L                   |                                |
| Urine M protein        | >=0.3 g/L                 |                                |
| Calcium                | >10.5 mmol/L              | <8.5                           |
| Age at transplant date | >=65(yr)                  |                                |

**Table S4. Univariable cox regression analysis for progression free and overall survival**

|         |                  | HR for PFS | 95% CI for PFS  | p-val for PFS | HR for OS | 95% CI for OS  | p-val for OS |
|---------|------------------|------------|-----------------|---------------|-----------|----------------|--------------|
| Age     | Young            | Reference  |                 |               | Reference |                |              |
|         | Old              | 1.496      | [1.257, 1.780]  | <0.0001       | 1.706     | [1.408, 2.067] | <0.0001      |
| Sex     | Female           | Reference  |                 |               | Reference |                |              |
|         | Male             | 1.166      | [0.981, 1.386]  | 0.0815        | 1.164     | [0.960, 1.411] | 0.122        |
| Race    | White            | Reference  |                 |               | Reference |                |              |
|         | Africa America n | 0.9396     | [0.7215, 1.224] | 0.644         | 1.018     | [0.765, 1.353] | 0.903        |
|         | others           | 0.6685     | [0.2148, 2.081] | 0.487         | 0.622     | [0.154, 2.495] | 0.503        |
| Isotype | Igg              | Reference  |                 |               | Reference |                |              |

|             |                           |           |                 |         |           |                 |         |
|-------------|---------------------------|-----------|-----------------|---------|-----------|-----------------|---------|
|             | Free Light Chain          | 0.9348    | [0.7427, 1.177] | 0.566   | 1.154     | [0.8973, 1.483] | 0.2651  |
|             | IgA                       | 1.17      | [0.9527, 1.436] | 0.134   | 1.361     | [1.087, 1.704]  | 0.0072  |
|             | Others                    | 1.112     | [0.6829, 1.812] | 0.669   | 1.591     | [0.958, 2.639]  | 0.0723  |
| Light       | Kappa                     | Reference |                 |         | Reference |                 |         |
|             | Lambda                    | 1.1607    | [0.9763, 1.380] | 0.0913  | 1.3808    | [1.1417, 1.670] | 0.0009  |
|             | Others                    | 0.7108    | [0.2940, 1.719] | 0.4485  | 0.8193    | [0.3052, 2.199] | 0.6924  |
| Urine light | None                      | Reference |                 |         | Reference |                 |         |
|             | Urine Light kappa or both | 1.165     | [0.9318, 1.457] | 0.1799  | 1.151     | [0.8947, 1.480] | 0.274   |
|             | Urine Light lambda        | 1.439     | [1.1292, 1.833] | 0.0033  | 1.671     | [1.278, 2.184]  | 0.0002  |
| PCBM        | low                       | Reference |                 |         | Reference |                 |         |
|             | high                      | 1.154     | [0.9752, 1.365] | 0.0956  | 1.31      | [1.088, 1.576]  | 0.0044  |
| ALB         | Normal (>=3.5)            | Reference |                 |         | Reference |                 |         |
|             | low                       | 1.274     | [1.062, 1.528]  | 0.0092  | 1.407     | [1.154, 1.716]  | 0.0007  |
| B2M         | Normal                    | Reference |                 |         | Reference |                 |         |
|             | High (>=5.5)              | 1.638     | [1.373, 1.953]  | <0.0001 | 1.967     | [1.624, 2.382]  | <0.0001 |
| LDH         | Normal                    | Reference |                 |         | Reference |                 |         |
|             | High (>=190)              | 1.367     | [1.129, 1.654]  | 0.0014  | 1.586     | [1.289, 1.952]  | <0.0001 |
| Creatinine  | Normal                    | Reference |                 |         | Reference |                 |         |
|             | High(>=2)                 | 1.575     | [1.229, 2.018]  | 0.0003  | 1.934     | [1.491, 2.508]  | <0.0001 |
| GFR         | Normal                    | Reference |                 |         | Reference |                 |         |
|             | Low (<60)                 | 1.378     | [1.160, 1.637]  | 0.0002  | 1.526     | [1.263, 1.844]  | <0.0001 |
| CRP         | Normal                    | Reference |                 |         | Reference |                 |         |

|                 |                  |           |                 |         |           |                 |         |
|-----------------|------------------|-----------|-----------------|---------|-----------|-----------------|---------|
|                 | High (>=8)       | 1.364     | [1.120, 1.660]  | 0.002   | 1.382     | [1.109, 1.723]  | 0.004   |
| Hb              | Normal (>10)     | Reference |                 |         | Reference |                 |         |
|                 | Low              | 1.613     | [1.353, 1.923]  | <0.0001 | 1.76      | [1.453, 2.133]  | <0.0001 |
| Platelets       | Normal           | Reference |                 |         | Reference |                 |         |
|                 | Low (<150)       | 1.547     | [1.255, 1.907]  | <0.0001 | 1.823     | [1.458, 2.279]  | <0.0001 |
| Monocytes       | Normal           | Reference |                 |         | Reference |                 |         |
|                 | Low (<2)         | 1.025     | [0.5068, 2.071] | 0.946   | 1.321     | [0.6216, 2.807] | 0.469   |
|                 | High (>8)        | 1.005     | [0.8503, 1.189] | 0.951   | 0.95      | [0.7890, 1.144] | 0.589   |
| Lymphocytes     | Normal           |           |                 |         |           |                 |         |
|                 | High             | 0.9387    | [0.7531, 1.170] | 0.5739  | 1.009     | [0.7911, 1.288] | 0.941   |
|                 | Low              | 1.232     | [1.005, 1.509]  | 0.0444  | 1.401     | [1.121, 1.750]  | 0.003   |
| Serum M protein | Low (<3)         | Reference |                 |         | Reference |                 |         |
|                 | high             | 1.133     | [0.959, 1.339]  | 0.141   | 1.014     | [0.8422, 1.221] | 0.884   |
| Urine M protein | Low (<0.3)       | Reference |                 |         | Reference |                 |         |
|                 | high             | 1.132     | [0.9585, 1.337] | 0.144   | 1.303     | [1.083, 1.569]  | 0.0052  |
| Ca              | Normal           | Reference |                 |         | Reference |                 |         |
|                 | High (>10,5)     | 1.306     | [0.9882, 1.726] | 0.0606  | 1.647     | [1.232, 2.201]  | 0.0008  |
|                 | Low (<8.5)       | 1.196     | [0.9369, 1.527] | 0.1508  | 1.276     | [0.9764, 1.667] | 0.0743  |
| t(4;14)         | No-translocation | Reference |                 |         | Reference |                 |         |
|                 | Translocation    | 1.1064    | [0.8673, 1.411] | 0.416   | 1.169     | [0.8969, 1.522] | 0.248   |

|          |                  |           |                |         |           |                |         |
|----------|------------------|-----------|----------------|---------|-----------|----------------|---------|
| t(14;16) | No-translocation |           |                |         |           |                |         |
|          | Translocation    | 1.624     | [1.117, 2.361] | 0.0111  | 1.934     | [1.3, 2.876]   | 0.0011  |
| t(14;20) | No-translocation |           |                |         |           |                |         |
|          | Translocation    | 1.627     | [1.041, 2.542] | 0.0327  | 1.361     | [0.824, 2.246] | 0.229   |
| del 1p   | No-del           | Reference |                |         | Reference |                |         |
|          | Del              | 1.422     | [1.171, 1.728] | 0.0004  | 1.516     | [1.224, 1.877] | 0.0001  |
| del 17p  | No-del           | Reference |                |         |           |                |         |
|          | Del              | 1.857     | [1.448, 2.380] | <0.0001 | 2.201     | [1.691, 2.865] | <0.0001 |
| +1q      | No-gain          | Reference |                |         |           |                |         |
|          | Gain             | 1.583     | [1.337, 1.873] | <0.0001 | 1.635     | [1.358, 1.969] | <0.0001 |

**Table S5. Variable differences in R2-ISS low risk stages (I and II)**

| Variables                  | Total (n = 190)      | Long, OS>10 year (n = 156) | Short, OS <3 year (n = 34) | p     |
|----------------------------|----------------------|----------------------------|----------------------------|-------|
| B2M, Median (Q1,Q3)        | 2.7 (2.1, 3.6)       | 2.64 (2.07, 3.4)           | 3.2 (2.47, 4.4)            | 0.005 |
| Age.at.Tx1, Median (Q1,Q3) | 59.09 (50.87, 64.63) | 57.63 (49.54, 63.87)       | 63.21 (59.2, 68.31)        | 0.001 |

**Table S6. Variable differences in R2-ISS high risk stages (III and IV)**

| Variables               | Total (n = 250) | Long (n = 130)  | Short (n = 120) | p       |
|-------------------------|-----------------|-----------------|-----------------|---------|
| Serum Light, n (%)      |                 |                 |                 | 0.012   |
| Kappa                   | 147 (59)        | 86 (66)         | 61 (51)         |         |
| Lambda                  | 102 (41)        | 43 (33)         | 59 (49)         |         |
| none                    | 1 (0)           | 1 (1)           | 0 (0)           |         |
| ALBUMIN, Median (Q1,Q3) | 3.6 (3.1, 4)    | 3.7 (3.23, 4.1) | 3.5 (3, 3.9)    | 0.050   |
| LDH, Median (Q1,Q3)     | 169 (135,       | 160 (125.25,    | 183.5 (141.75,  | < 0.001 |

|                           |               |               |               |       |
|---------------------------|---------------|---------------|---------------|-------|
|                           | 215.75)       | 197.25)       | 232)          |       |
|                           | 203 (151,     | 210 (165.25,  | 197 (127,     | 0.033 |
| Platelets, Median (Q1,Q3) | 255.75)       | 258.75)       | 254.25)       |       |
| Age.at.Tx1, Median        | 59.87 (52.29, | 58.84 (51.49, | 61.58 (54.03, | 0.015 |
| (Q1,Q3)                   | 66.21)        | 63.87)        | 67.58)        |       |
| t(14;16), n (%)           |               |               |               | 0.029 |
| No-translocation          | 233 (93)      | 126 (97)      | 107 (89)      |       |
| Translocation             | 17 (7)        | 4 (3)         | 13 (11)       |       |
| del 17p, n (%)            |               |               |               | 0.002 |
| del 17p                   | 37 (15)       | 10 (8)        | 27 (22)       |       |
| No_del 17p                | 213 (85)      | 120 (92)      | 93 (78)       |       |
